# Supplementary material for: Ti3AlC2 MAX Phase Modified Screen-Printed Electrode for the Fabrication of Hydrazine Sensor
Source: MDPI journal article supplement (doi:10.3390/mi15050633), 2024-05-09
Supplement: s1 [file s1]

# Supporting Information

## **Ti<sub>3</sub>AlC<sub>2</sub> MAX Phase Modified Screen-Printed Electrode for the Fabrication of Hydrazine Sensor**

**Khursheed Ahmad <sup>1,\*</sup>, Waseem Raza <sup>2</sup> and Rais Ahmad Khan <sup>3</sup>**

<sup>1</sup> School of Materials Science and Engineering, Yeungnam University,  
Gyeongsan 38541, Republic of Korea

<sup>2</sup> Department of Materials Science and Engineering, WW4-LKO, University of  
Erlangen-Nuremberg, Martensstrasse 7, 91058 Erlangen, Germany

<sup>3</sup> Department of Chemistry, College of Science, King Saud University,  
Riyadh 11451, Saudi Arabia

\* Correspondence: khursheed.energy@gmail.com

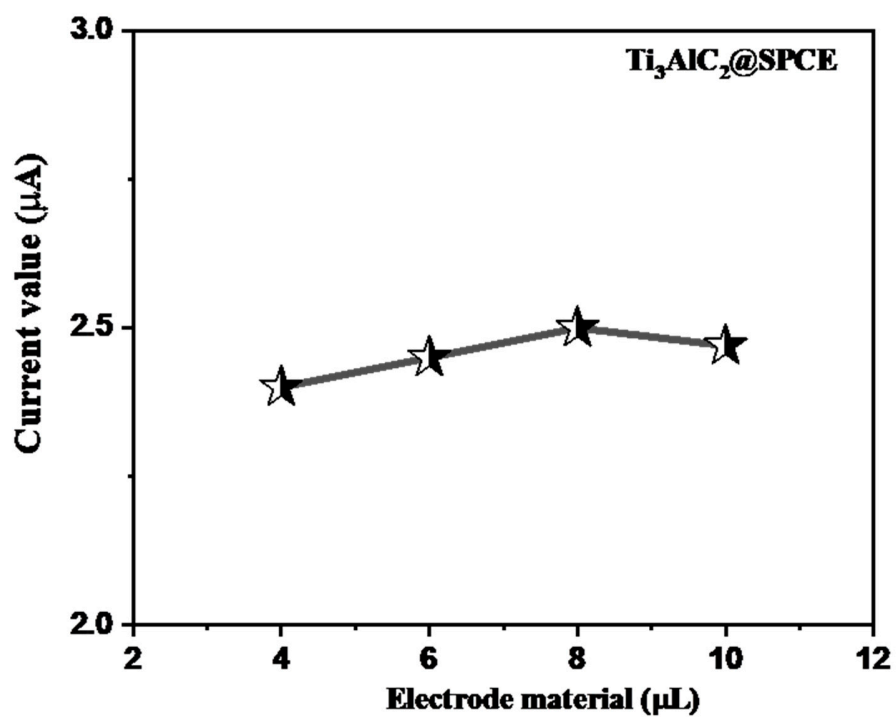

**Figure S1.** Current responses of the different mass loading of the  $\text{Ti}_3\text{AlC}_2\text{@SPCE}$  in presence of  $55 \mu\text{M}$  Hz under the  $0.1 \text{ M}$  PBS conditions ( $\text{pH} = 8.0$ ) at the applied scan potential of  $50 \text{ mVs}^{-1}$ .

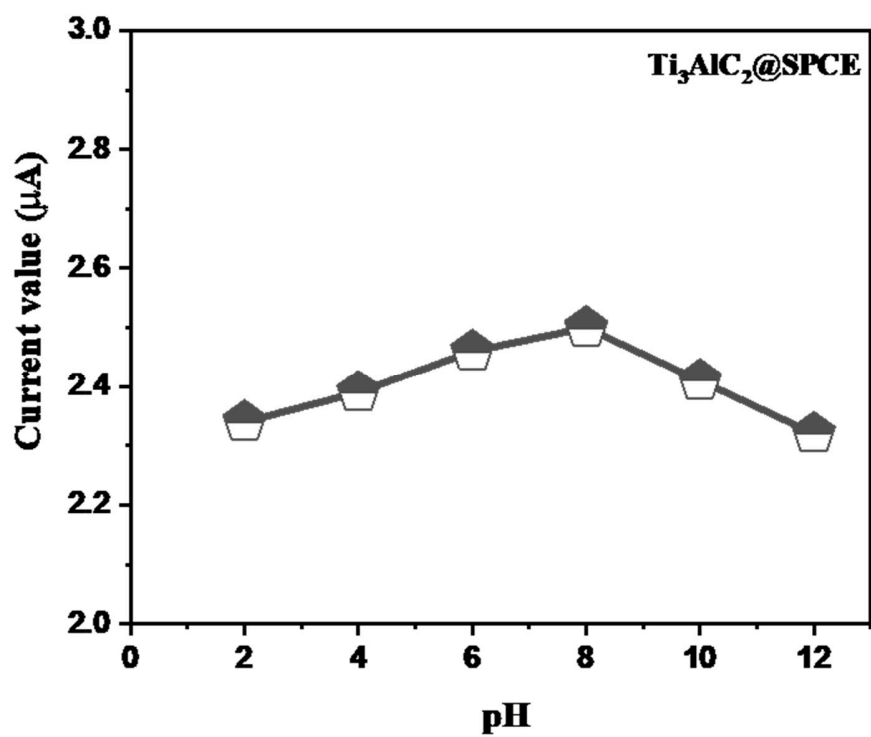

**Figure S2.** Current responses of the  $\text{Ti}_3\text{AlC}_2@\text{SPCE}$  in presence of  $55 \mu\text{M}$  Hz under the  $0.1 \text{ M}$  PBS conditions ( $\text{pH} = 2, 4, 6, 8, 10$ , and  $12$ ) at the applied scan potential of  $50 \text{ mVs}^{-1}$ .
